# Supplementary material for: Circadian fluctuation of soluble CD26 dictates the impact of the timing of cord blood transplantation on acute graft-versus-host disease
Source: Research Square preprint supplement (doi:10.21203/rs.3.rs-6651823/v1), 2025-06-19

**Supplementary information**

**Supplementary Table 1. Detailed information of antibodies in flow cytometry, IHC and IF assays.**

| **Antibodies and Reagents** | **Source** | **Identifier** |
| --- | --- | --- |
| AF700-anti human CD45 Monoclonal Antibody (2D1) | Invitrogen | Cat#56-9459-42; RRID: AB_2574511 |
| APC-H7-anti human CD3 Monoclonal Antibody (SK7) | BD | Cat#560176; RRID: AB_1645475 |
| BV650-anti human CD56 Monoclonal Antibody (NCAM16.2) | BD | Cat#564057; RRID: AB_2738568 |
| PE-Cy7-anti human CD4 Monoclonal Antibody (RPA-T4) | Invitrogen | Cat#25-0049-42; RRID: AB_1659695 |
| BV605-anti human CD8 Monoclonal Antibody (SK1) | BD | Cat#564116; RRID: AB_2869551 |
| PerCP5.5-anti human CD38 Monoclonal Antibody (Ab90) | BD | Cat#562770; RRID: AB_2737782 |
| PE-anti human Ki-67 Antibody (Ki-67) | Biolegend | Cat#350503; RRID: AB_10660818 |
| BV421-anti human IFNγ Monoclonal Antibody (B27) | Biolegend | Cat#506537; RRID: AB_2801097 |
| BV510-anti human CD14 Antibody (63D3) | Biolegend | Cat#367124; RRID: AB_2716229 |
| PE-anti human CD80 Antibody (W17149D) | Biolegend | Cat#375409; RRID: AB_2890820 |
| BV421-anti human CD86 Monoclonal Antibody (FUN-1) | BD | Cat#562432; RRID: AB_11153866 |
| PE-anti human CD34 (563) | BD | Cat#550761; RRID: AB_393871 |
| Anti-human CD4 antibody (EPR6855) | Abcam | Cat#ab133616; RRID: AB_2750883 |
| Anti-human CD8 antibody (SP16) | ZSGB-BIO | Cat#ZA-0508; RRID: AB_2890107 |
| Anti-mouse CD4 antibody (D7D2Z) | CST | Cat#25229; RRID: AB_2798898 |
| Anti-mouse CD8A antibody (D7D2Z) | ABclonal | Cat#A23305PM; RRID: AB_3678718 |
| Recombinant Anti-EpCAM antibody (EPR20532-222) | Abcam | Cat#ab213500; RRID: AB_2884975 |
| Recombinant Anti-DPP4 antibody (EPR20819) | Abcam | Cat#ab215711; RRID: AB_2734752 |
| Foxp3/ Transcription Factor Staining Buffer set | eBioscience | Cat#00-5523-00; RRID: N/A |
| Fixable Viability Dye eFluor™ 520 | eBioscience | Cat#65-0867-14; RRID: N/A |
| APC Annexin V | BD | Cat#550474; RRID: AB_2868885 |
| DAPI Solution | BD | Cat#564907; RRID: AB_2869624 |

**Supplementary Table 2. Primer sequences in PCR assays.**

| Gene | Forward Primer | Reverse Primer |
| --- | --- | --- |
| GAPDH | 5’ TGTGTCCGTCGTGGATCTGA 3’ | 5’ CCTGCTTCACCACCTTCTTGA 3’ |
| DPP4 | 5’ TCATGGAACGGCAGATGATAA 3’ | 5’ TGCCAAAGGGGAAACTAGACC 3’ |
| Bmal1 | 5’ TAGGCCTTCATTGCACCTTCC 3’ | 5’ ACTGCCTTTCCTCTTGCGAT 3’ |

**Supplementary Fig. 1 Gating strategy for flow cytometry analysis, related to Fig. 5**

(**a**) Gating strategy for analyzing CD14+ cells in PBMCs from healthy donors after coculture. Starting from the upper left panel and following the arrows, monocytes were initially selected by CD45+ SSC intermediate cells and then successively gated for single cells, live CD45+ cells, and monocytes (CD3-CD56-CD14+).

**(b**) Gating strategy for analyzing T cells in PBMCs from healthy donors after coculture. Starting from the upper left panel, the cells were successively gated for lymphocytes, single cells, live CD45+ cells, and T cells (CD3+CD56-). T cells were further subdivided into CD4+ and CD8+ subsets.

The expression of CD80+ and CD86+ in CD14+ cells and the expression of IFNγ+, CD38+, and Ki-67+ in CD4+ and CD8+ T-cell subsets were analyzed using the Fluorescence Minus One (FMO) strategy.


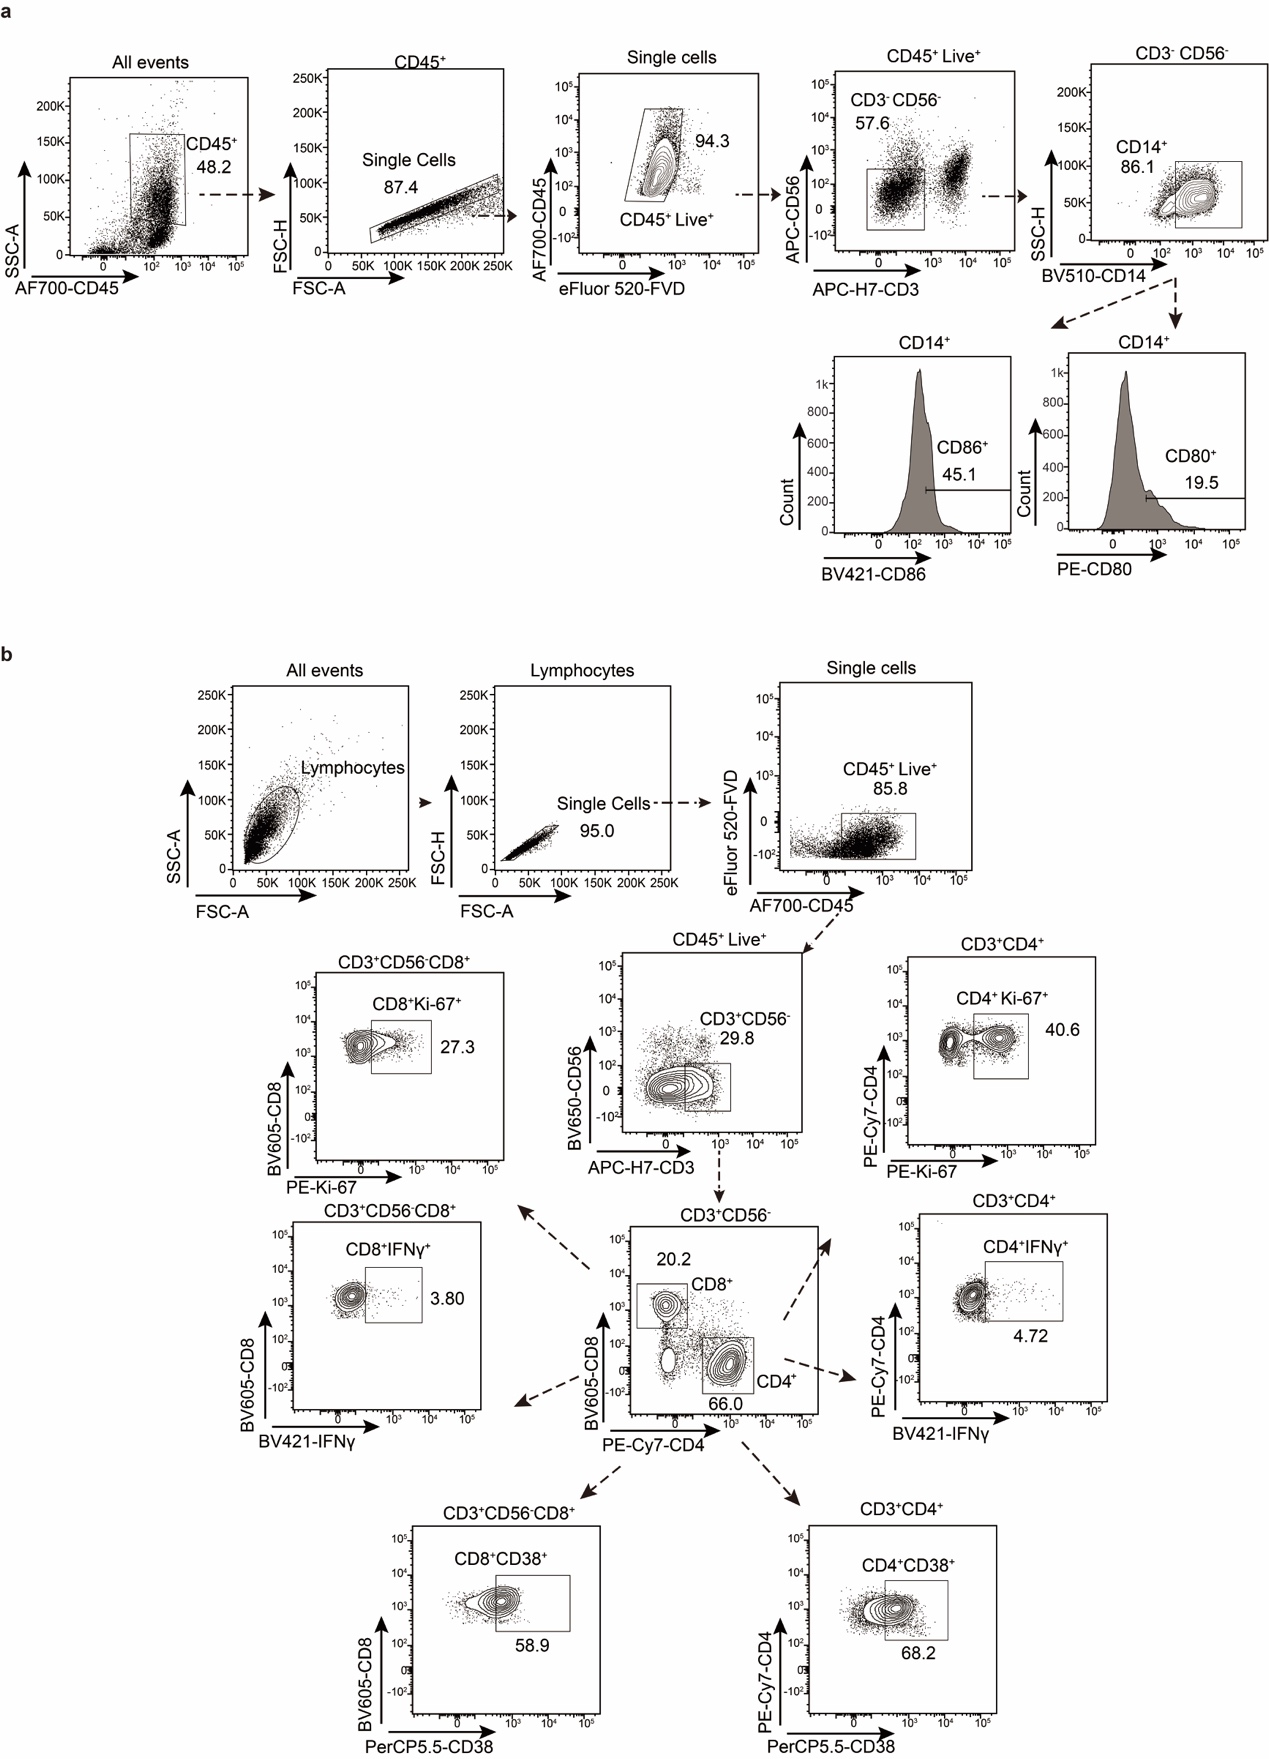

Supplement: Supplementary file 1 [file 7b2a988cd6d0d5deee4eb083.docx]
